# Supplementary material for: Glycogen Synthase Kinase 3β Inhibition as a Therapeutic Approach in the Treatment of Endometrial Cancer
Source: Int J Mol Sci. 2013 Aug 12;14(8):16617–37. doi: 10.3390/ijms140816617 (PMC3759928; doi:10.3390/ijms140816617)
Supplement: Supplementary file 1 [file ijms-14-16617-s001.pdf]

## Supplementary Information

**Figure S1.** LiCl treatment induces GSK3 $\beta$  inhibition in endometrial cancer cells. (A) Western blot analysis of total GSK3 $\beta$  and pSer9 GSK3 $\beta$  for EM-TERT and AN3CA after indicated hours of treatment with 10mM LiCl. Increased phosphorylation at serine 9 residue of GSK3 $\beta$  (pSer9 GSK3 $\beta$ ) observed in both cell lines as early as 24 h; (B) Normalization of pSer9 to total GSK3 showing that the relative increase in pSer9 GSK3 $\beta$  is more pronounced in AN3CA cells and that the ratio of pSer9 GSK3 $\beta$  to total GSK3 $\beta$  increases overtime.

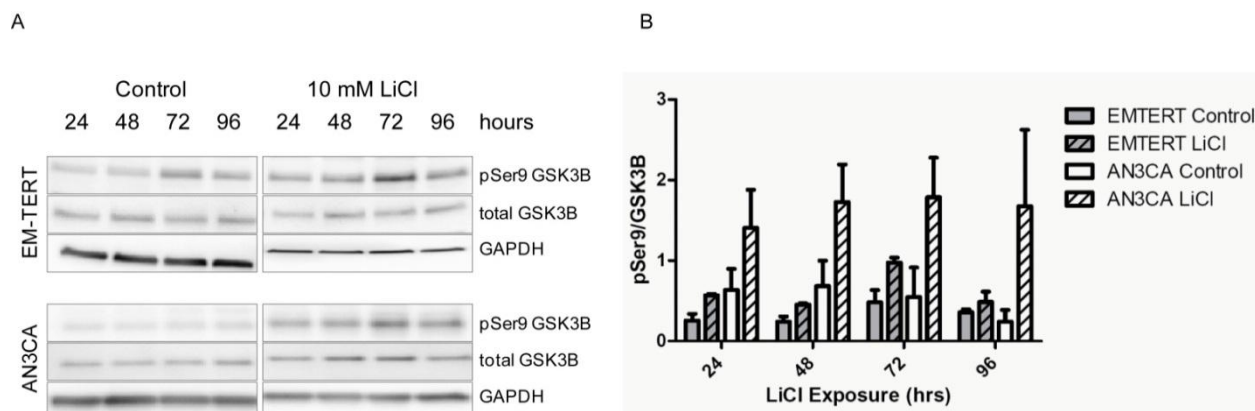

**Figure S2.** Trypan Blue exclusion test on endometrial cell lines treated with no drug (control), LiCl or GSK3 inhibitor VIII. At 10 mM, LiCl treatment increased cell death in AN3CA and ARK1 cells, without affecting EM-TERT cells. GSK3 inhibitor VIII on the other hand exhibited varied cell toxicity in all three cell lines with greatest fold increases in nonviable cells seen in the AN3CA cells.

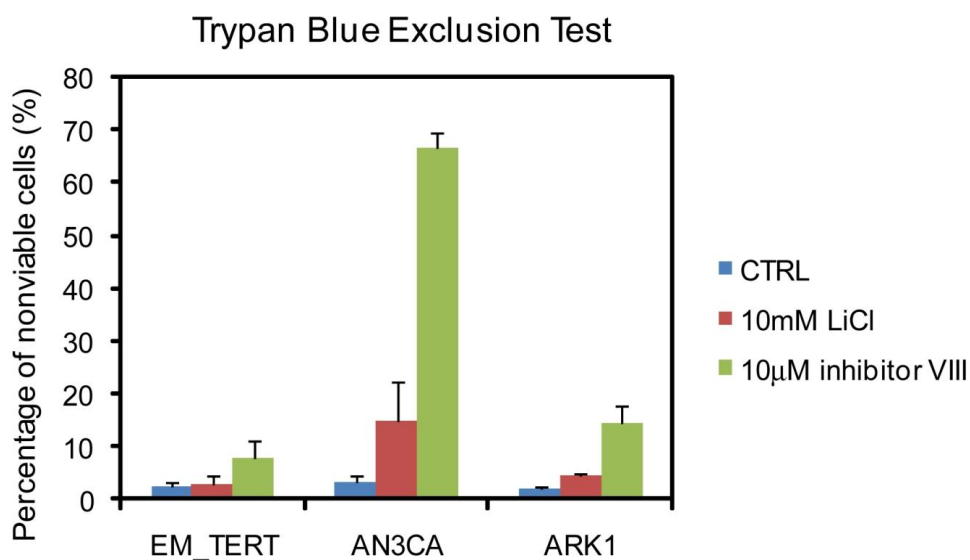

**Figure S3.** Representative FACS analyses on cell cycle progression in untreated (red) and 10  $\mu$ M GSK3 $\beta$  inhibitor VIII-treated (blue) endometrial cell lines. In AN3CA cells, percentage of cells in G2/M phase steadily increased and peaked at 96 h. No such changes were detected in the EM-TERT cell line. Percentages of cells in G2/M are indicated.

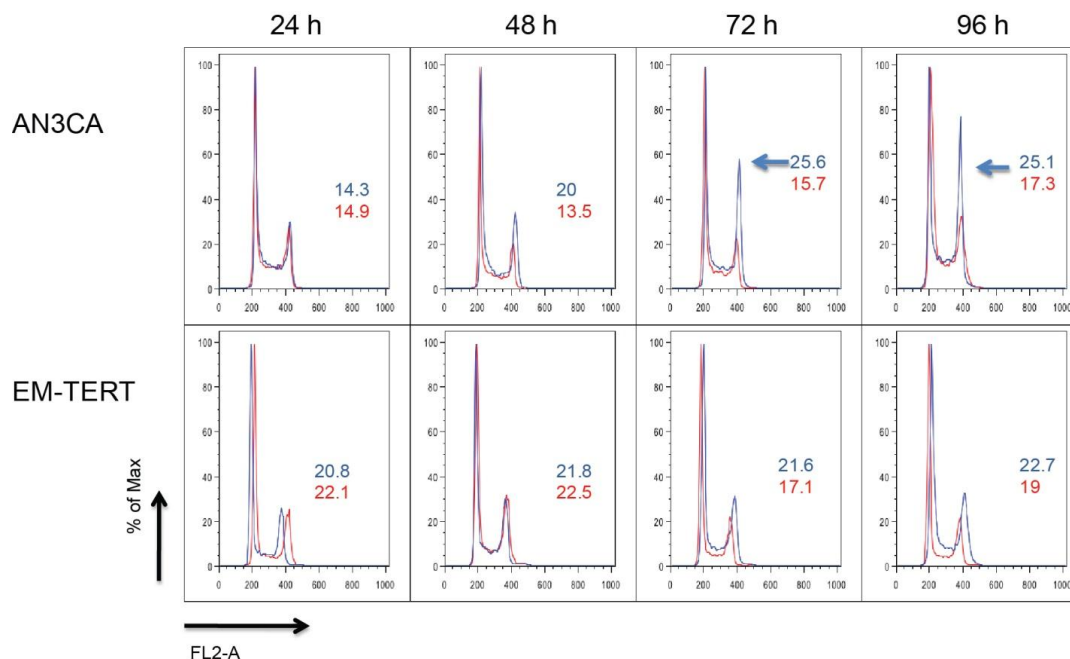

**Table S1.** Gene expression changes in AN3CA cells treated with PTX alone or in combination with LiCl.

| Gene name | Accession number | PCR primers sequence                                      | Fold-change PTX<br>( <i>p</i> -value compared to control) | Fold-change PTX + LiCl<br>( <i>p</i> -value compared to PTX alone) |
|-----------|------------------|-----------------------------------------------------------|-----------------------------------------------------------|--------------------------------------------------------------------|
| *ARHGDIB  | NM_001175        | 5'GACTGGGGTGAAAGTGGATAAAG3'<br>5'TCGTCGGTGAAGAAGGACTTG3'  | 0.52 (0.012)                                              | 0.30 (0.035)                                                       |
| *ABCB1    | NM_000927        | 5'TTGCTGCTTACATTCAGGTTTCA3'<br>5'AGCCTATCTCCTGTCGCATTAA3' | 0.78 (0.039)                                              | 0.46 (0.005)                                                       |
| KRT4      | NM_002272        | 5'CGCGAACAGATCAAGCTCCT3'<br>5'GGGGCTCAAGGTTTTTGCTG3'      | 0.69<br>(0.048)                                           | 0.52 (0.30)                                                        |
| PDAP1     | NM_014891        | 5'CAAAGGAGCTTTCGAGGAGAG3'<br>5'GTGGCATCGTCTTTTGCTTTC3'    | 1.23 (0.29)                                               | 1.19 (0.78)                                                        |
| FDFT1     | NM_004462        | 5'ACTTCCCAACGATCTCCCTTG3'<br>5'CCCATCTCCGGCAAATGTC3'      | 0.89 (0.45)                                               | 0.81 (0.24)                                                        |
| IFITM2    | NM_00643         | 5'ATGAACCACATTGTGCAAACCT3'<br>5'CCCAGCATAGCCACTTCT3'      | 0.66 (0.031)                                              | 0.62 (0.32)                                                        |
| TRIP6     | NM_003302        | 5'GTGGGCTGCTTTGTATGTTCT3'<br>5'GCCCTCGCAATATGCCCTC3'      | 1.15 (0.47)                                               | 0.98 (0.62)                                                        |

The list of genes are based on a previous study [41]; Primer sequences were obtained from PrimerBank database [42];

\* Genes showed augmented changes by PTX in LiCl-treated cells.

**Figure S4.** Rapid return to pre-treatment cell cycle phases upon removal of LiCl. 24 h after LiCl-withdrawal, the LiCl-induced G2/M arrest started to resolve.

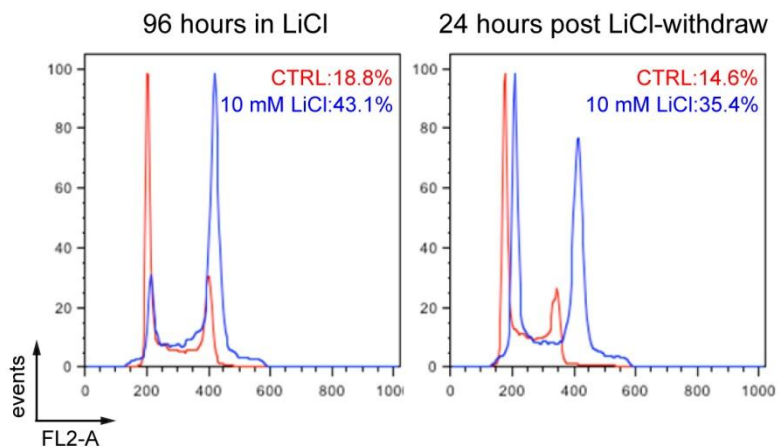

© 2013 by the authors; licensee MDPI, Basel, Switzerland. This article is an open access article distributed under the terms and conditions of the Creative Commons Attribution license (<http://creativecommons.org/licenses/by/3.0/>).
